# Supplementary material for: Superparamagnetic core-shell polymer particles for efficient purification of his-tagged proteins
Source: Royal Society of Chemistry journal article supplement (doi:10.1039/c0jm02081h), 2010-01-01
Supplement: c0jm02081h.pdf [file c0jm02081h.pdf]

Supporting Information for

## Superparamagnetic Core-Shell Polymer Particles for Efficient Purification of His-Tagged Proteins\*\*

Weijun Fang, Xiaolan Chen, and Nanfeng Zheng\*

*State Key Laboratory for Physical Chemistry of Solid Surfaces and Department of Chemistry, College of Chemistry and Chemical Engineering, Xiamen University, Xiamen 361005, China*

Email: nfzheng@xmu.edu.cn

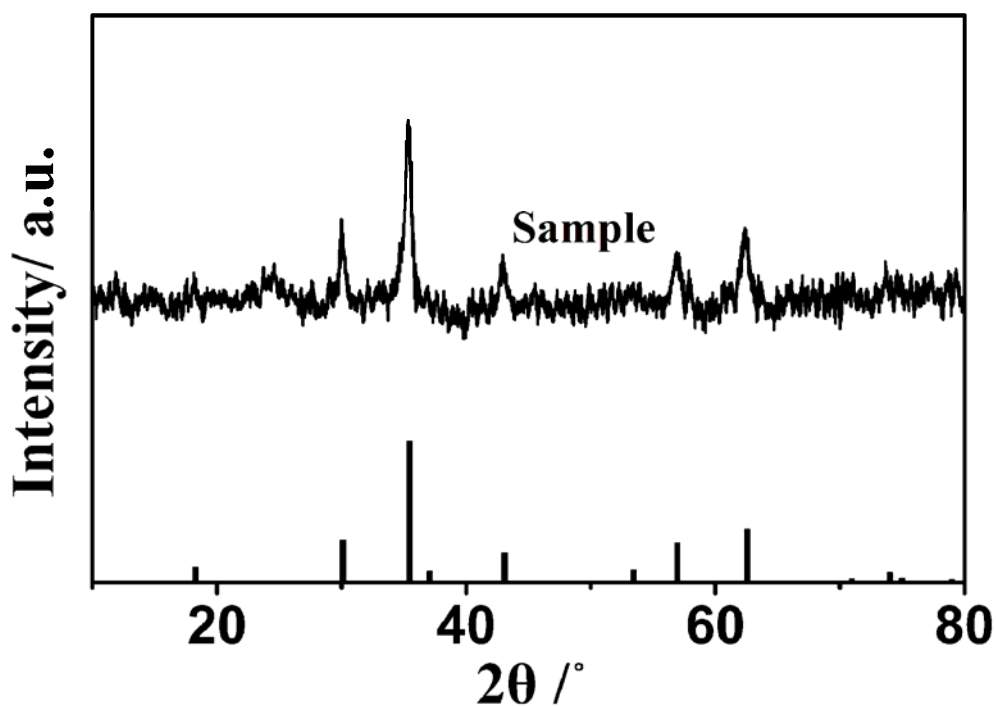

**Figure S1.** The XRD pattern of the as-prepared  $\text{Fe}_3\text{O}_4$  spheres. The pattern matches that of inverse spinel magnetite ( $\text{Fe}_3\text{O}_4$ ) (JCPDS 82-1533) shown at the bottom.

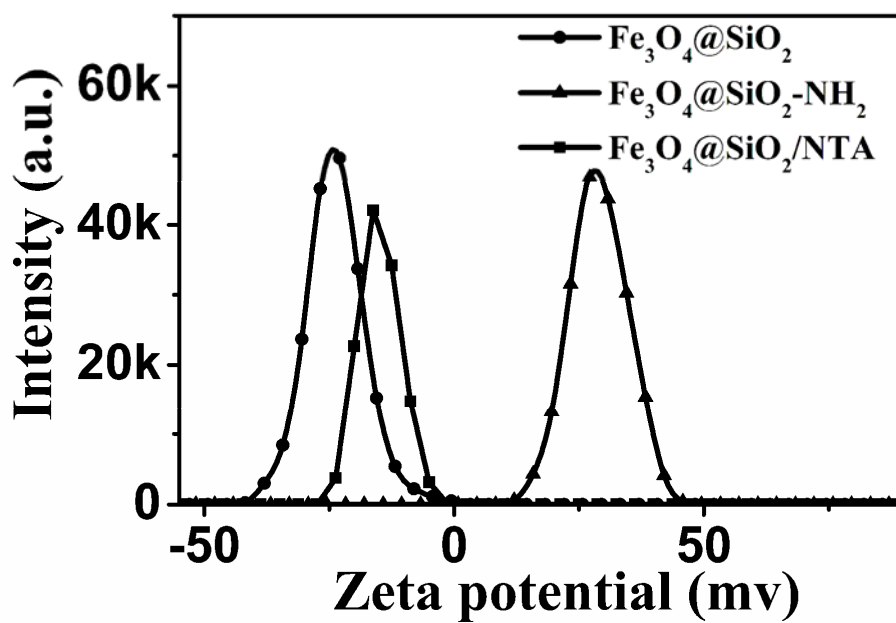

**Figure S2.** Zeta potentials of  $\text{Fe}_3\text{O}_4@\text{SiO}_2$  spheres,  $\text{Fe}_3\text{O}_4@\text{SiO}_2\text{-NH}_2$  spheres and  $\text{Fe}_3\text{O}_4@\text{SiO}_2/\text{NTA}$  spheres in ultra-pure water.

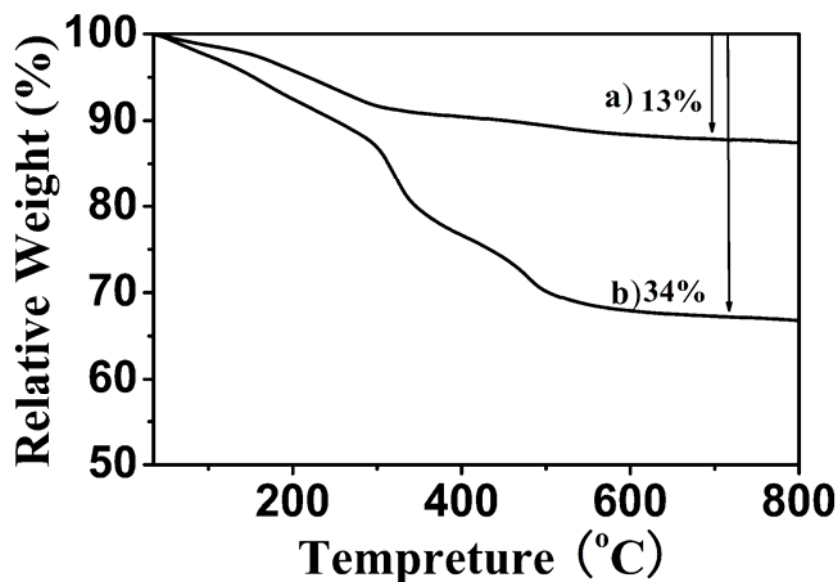

**Figure S3.** TGA curves of a)  $\text{Fe}_3\text{O}_4@\text{SiO}_2/\text{MA}$  spheres and b)  $\text{Fe}_3\text{O}_4@\text{SiO}_2/\text{P(St-alt-MAN)}$  spheres.

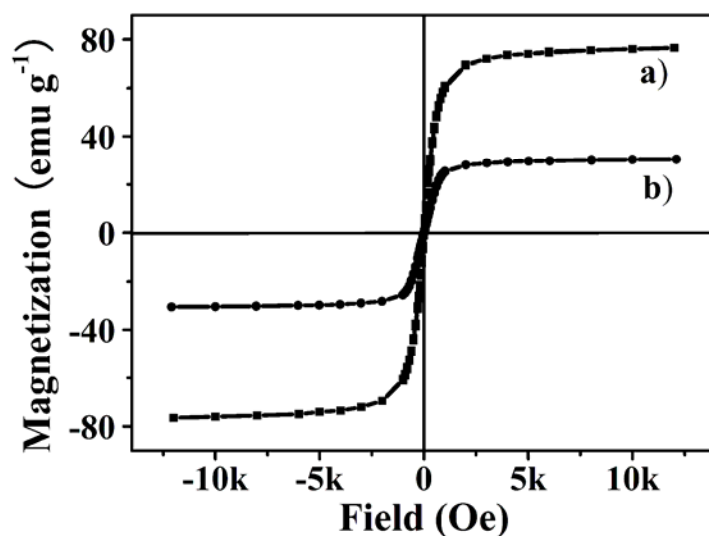

**Figure S4.** The hysteresis loops of a) Fe<sub>3</sub>O<sub>4</sub> spheres, b) Fe<sub>3</sub>O<sub>4</sub>@SiO<sub>2</sub>/P(St-alt-MAA)/ Ni-NTA spheres.

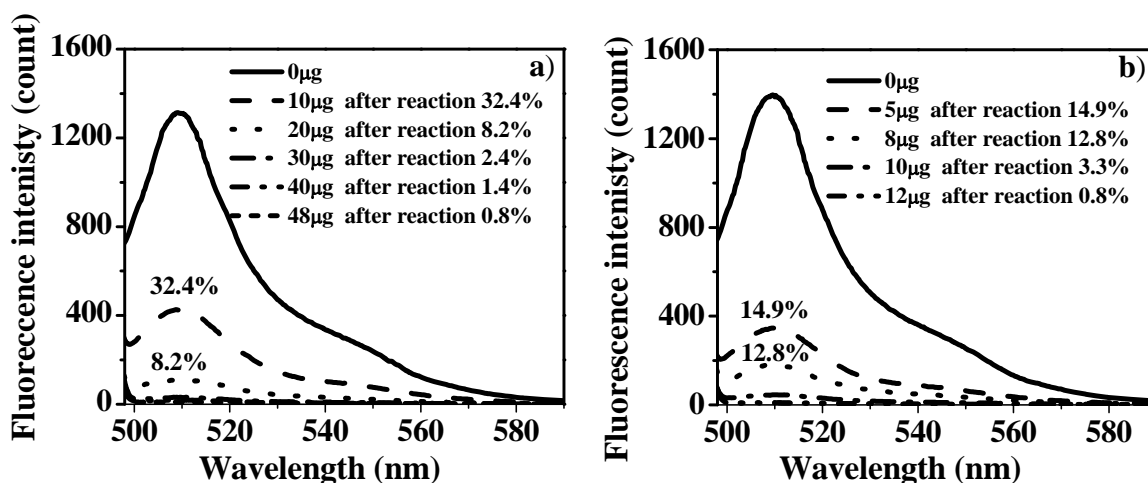

**Figure S5.** The fluorescence spectra showing the change of emission intensity in the GFP capturing experiments with different amount of magnetic spheres. a) 6.0 μg of His-tagged GFP was mixed with 10μg, 20μg, 30μg, 40μg and 48μg of Fe<sub>3</sub>O<sub>4</sub>@SiO<sub>2</sub>/ Ni-NTA spheres in PBS buffer. b) 6.0 μg of His-tagged GFP was mixed with 5μg, 8μg, 10μg and 12μg of Fe<sub>3</sub>O<sub>4</sub>@SiO<sub>2</sub>/P(St-alt-MAA)/ Ni-NTA spheres in PBS buffer. The spectra were measured from the supernatants after the separation of magnetic spheres.
